# Supplementary material for: Assessing Reduction of Antibiotic Prescribing for Acute, Non-Complicated Infections in Primary Care in Germany: Multi-Step Outcome Evaluation in the Cluster-Randomized Trial ARena
Source: MDPI journal article supplement (doi:10.3390/antibiotics10101151), 2021-09-24
Supplement: s1 [file s1]

## Supplementary Materials

### Supplementary File S1:

**Table S1: Distribution of medical specialty groups pre and post intervention.**

| Intervention arm        | I               |                  | II              |                  | III             |                  | Matched standard care |                   |
|-------------------------|-----------------|------------------|-----------------|------------------|-----------------|------------------|-----------------------|-------------------|
|                         | pre<br>(n = 68) | post<br>(n = 68) | pre<br>(n = 57) | post<br>(n = 57) | pre<br>(n = 68) | post<br>(n = 67) | pre<br>(n = 190)      | post<br>(n = 190) |
| Medical specialty group |                 |                  |                 |                  |                 |                  |                       |                   |
| General Practice        | 53 (77.9%)      | 53 (77.9%)       | 43 (75.4%)      | 43 (75.4%)       | 50 (73.5%)      | 51 (76.1%)       | 144 (75.8%)           | 144 (75.8%)       |
| Otolaryngology          | 6 (8.8%)        | 6 (8.8%)         | 7 (12.3%)       | 7 (12.3%)        | 6 (8.8%)        | 6 (9.0%)         | 17 (8.9%)             | 17 (8.9%)         |
| Urology                 | 5 (7.4%)        | 5 (7.4%)         | 2 (3.5%)        | 2 (3.5%)         | 4 (5.9%)        | 4 (6.0%)         | 13 (6.8%)             | 13 (6.0%)         |
| Pediatrics              | 1 (1.5%)        | 1 (1.5%)         | 2 (3.5%)        | 2 (3.5%)         | 0 (0%)          | 0 (0%)           | 5 (2.6%)              | 5 (2.6%)          |
| Gynecology              | 1 (1.5%)        | 1 (1.5%)         | 1 (1.8%)        | 1 (1.8%)         | 6 (8.8%)        | 5 (7.5%)         | 8 (4.2%)              | 8 (4.2%)          |
| Other                   | 2 (2.9%)        | 2 (2.9%)         | 2 (3.5%)        | 2 (3.5%)         | 2 (2.9%)        | 1 (1.5%)         | 3 (1.6%)              | 3 (1.6%)          |

**Table S2: Patients with index disease—pre-/post-intervention and comparison to matched standard care.**

|             |                                             | Intervention arm I |                     | Intervention arm II |                    | Intervention arm III |                    | Matched standard care<br>(no intervention) |                      |
|-------------|---------------------------------------------|--------------------|---------------------|---------------------|--------------------|----------------------|--------------------|--------------------------------------------|----------------------|
|             |                                             | Pre<br>(n = 9673)  | Post<br>(n = 10143) | Pre<br>(n = 4583)   | Post<br>(n = 6730) | Pre<br>(n = 3951)    | Post<br>(n = 5076) | Pre<br>(n = 25.385)                        | Post<br>(n = 25.144) |
| Age         | 18-65                                       | 7537<br>(77.9%)    | 7869<br>(77.6%)     | 3497<br>(76.3%)     | 4684<br>(69.6%)    | 2972<br>(75.2%)      | 3910<br>(77.0%)    | 18,974<br>(74.7%)                          | 18,960<br>(75.4%)    |
|             | <18                                         | 707<br>(7.3%)      | 578<br>(5.7%)       | 297<br>(6.5%)       | 757<br>(11.2%)     | 145<br>(3.7%)        | 143<br>(2.8%)      | 4,084<br>(16.1%)                           | 4,210 (16.7%)        |
|             | >65                                         | 1429<br>(14.8%)    | 1696<br>(16.7%)     | 789<br>(17.2%)      | 1289<br>(19.2%)    | 834<br>(21.1%)       | 1023<br>(20.2%)    | 2,327<br>(9.2%)                            | 1,974<br>(7.9%)      |
| Gender      | Male                                        | 4147<br>(42.9%)    | 4405<br>(43.4%)     | 1860<br>(40.6%)     | 2900<br>(43.1%)    | 1606<br>(40.6%)      | 2074<br>(40.9%)    | 11,688 (46.0%)                             | 11,891<br>(47.3%)    |
|             | Female                                      | 5526<br>(57.1%)    | 5738<br>(56.6%)     | 2723<br>(59.4%)     | 3830<br>(56.9%)    | 2345<br>(59.4%)      | 3002<br>(59.1%)    | 13,697<br>(54.0%)                          | 13,253<br>(52.7%)    |
| Nationality | German                                      | 8962<br>(92.6%)    | 9115<br>(89.9%)     | 3693<br>(80.6%)     | 5425<br>(80.6%)    | 3325<br>(84.2%)      | 4144<br>(81.6%)    | 19,899<br>(78.4%)                          | 18,681<br>(74.3%)    |
|             | Northern<br>European                        | 21<br>(0.2%)       | 26<br>(0.3%)        | 26<br>(0.6%)        | 39<br>(0.6%)       | 32<br>(0.8%)         | 37<br>(0.7%)       | 149<br>(0.6%)                              | 181<br>(0.7%)        |
|             | Eastern<br>European,<br>Turkish,<br>Arabian | 596<br>(6.2%)      | 847<br>(8.4%)       | 607<br>(13.2%)      | 901<br>(13.4%)     | 427<br>(10.8%)       | 680<br>(13.4%)     | 3,995<br>(15.7%)                           | 4,854 (19.3%)        |
|             | Other                                       | 44<br>(0.5%)       | 74<br>(0.7%)        | 81<br>(1.8%)        | 117<br>(1.7%)      | 38<br>(1.0%)         | 62<br>(1.2%)       | 476<br>(1.9%)                              | 543<br>(2.2%)        |

|                                    |          | Intervention arm I |                     | Intervention arm II |                    | Intervention arm III |                    | Matched standard care<br>(no intervention) |                      |
|------------------------------------|----------|--------------------|---------------------|---------------------|--------------------|----------------------|--------------------|--------------------------------------------|----------------------|
|                                    |          | Pre<br>(n = 9673)  | Post<br>(n = 10143) | Pre<br>(n = 4583)   | Post<br>(n = 6730) | Pre<br>(n = 3951)    | Post<br>(n = 5076) | Pre<br>(n = 25.385)                        | Post<br>(n = 25.144) |
| Charlson<br>Comorbid-<br>ity Index | Southern | 50                 | 81                  | 176                 | 248                | 129                  | 153                | 866                                        | 885                  |
|                                    | European | (0.5%)             | (0.8%)              | (3.8%)              | (3.7%)             | (3.3%)               | (3.0%)             | (3.4%)                                     | (3.5%)               |
|                                    | 0        | 5621<br>(58.1%)    | 5734<br>(56.5%)     | 2462<br>(53.7%)     | 3858<br>(57.3%)    | 1976<br>(50.0%)      | 2604<br>(51.3%)    | 16,842<br>(66.3%)                          | 17,412<br>(69.2%)    |
|                                    | 1, 2     | 2761<br>(28.5%)    | 2926<br>(28.8%)     | 1445<br>(31.5%)     | 1945<br>(28.9%)    | 1276<br>(32.3%)      | 1609<br>(31.7%)    | 6,816<br>(26.9%)                           | 6,259 (24.9%)        |
|                                    | 3, 4     | 624<br>(6.5%)      | 781<br>(7.7%)       | 365<br>(8.0%)       | 453<br>(6.7%)      | 345<br>(8.7%)        | 492<br>(9.7%)      | 966<br>(3.8%)                              | 830<br>(3.3%)        |
|                                    | ≥5       | 667<br>(6.9%)      | 702<br>(6.9%)       | 311<br>(6.8%)       | 474<br>(7.0%)      | 354<br>(9.0%)        | 371<br>(7.3%)      | 761<br>(3.0%)                              | 643<br>(2.6%)        |
| Bronchitis                         |          | 2931<br>(30.3%)    | 2442<br>(24.1%)     | 1231<br>(26.9%)     | 1569<br>(23.3%)    | 1343<br>(34.0%)      | 1457<br>(28.7%)    | 6,322<br>(24.9%)                           | 5,796 (23.1%)        |
| URTI                               |          | 6301<br>(65.1%)    | 7620<br>(75.1%)     | 3037<br>(66.3%)     | 4916<br>(73.0%)    | 2720<br>(68.8%)      | 3719<br>(73.3%)    | 17,340<br>(68.3%)                          | 17,663<br>(70.2%)    |
| Sinusitis                          |          | 968<br>(10.0%)     | 962<br>(9.5%)       | 453<br>(9.9%)       | 867<br>(12.9%)     | 485<br>(12.3%)       | 700<br>(13.8%)     | 1,712<br>(6.7%)                            | 1,642<br>(6.5%)      |
| Tonsillitis                        |          | 559<br>(5.8%)      | 507<br>(5.0%)       | 327<br>(7.1%)       | 335<br>(5.0%)      | 166<br>(4.2%)        | 220<br>(4.3%)      | 1,753<br>(6.9%)                            | 1,654<br>(6.6%)      |
| Otitis Me-<br>dia                  |          | 459 (4.7%)         | 474<br>(4.7%)       | 270<br>(5.9%)       | 357<br>(5.3%)      | 139<br>(3.5%)        | 263<br>(5.2%)      | 1,826<br>(7.2%)                            | 1,809<br>(7.2%)      |

## Supplementary File S2:

**Table S3: Percentage of cases with index disease receiving prescription for recommended antibiotics (pre-/post-intervention).**

|                                  |                                    | Intervention arm 1 |        | Intervention arm 2 |       | Intervention arm 3 |       | Matched standard care (no intervention) |        |
|----------------------------------|------------------------------------|--------------------|--------|--------------------|-------|--------------------|-------|-----------------------------------------|--------|
|                                  |                                    | Pre                | Post   | Pre                | Post  | Pre                | Post  | Pre                                     | Post   |
| Primary Outcome                  | Sample Size of endpoint population | 9,673              | 10,143 | 4,583              | 6,730 | 3,951              | 5,076 | 25,385                                  | 25,144 |
|                                  | % primary outcome                  | 31.8%              | 20.1%  | 28.8%              | 18.9% | 36.3%              | 23.6% | 33.9%                                   | 29.4%  |
| SO1: Fluoroquinolones            | Sample Size of endpoint population | 3,119              | 2,079  | 1,391              | 1,347 | 1,488              | 1,249 | 8,885                                   | 7,655  |
|                                  | % Fluoroquinolones                 | 11.3%              | 7.3%   | 7.7%               | 4.5%  | 9.1%               | 7.1%  | 9.1%                                    | 7.5%   |
| SO2: Recommended AB acute URTI   | Sample Size of endpoint population | 1,541              | 1,206  | 626                | 613   | 827                | 734   | 4,311                                   | 3,637  |
|                                  | % Recommended AB acute URTI        | 18.7%              | 25.5%  | 18.7%              | 32.6% | 18%                | 25.3% | 16.7%                                   | 18.7%  |
| SO3: Recommended AB Bronchitis   | Sample Size of endpoint population | 1,310              | 727    | 551                | 463   | 681                | 503   | 3,115                                   | 2,684  |
|                                  | % Recommended AB Bronchitis        | 26.6%              | 32.5%  | 16.7%              | 28.7% | 21.3%              | 30.6% | 19.0%                                   | 23.2%  |
| SO4: Recommended AB Sinusitis    | Sample Size of endpoint population | 411                | 300    | 122                | 196   | 215                | 201   | 904                                     | 768    |
|                                  | % Recommended AB Sinusitis         | 18.7%              | 23.0%  | 25.4%              | 28.1% | 26.5%              | 31.8% | 16.4%                                   | 18.8%  |
| SO5: Recommended AB Tonsillitis  | Sample Size of endpoint population | 403                | 355    | 276                | 274   | 150                | 171   | 1,511                                   | 1,388  |
|                                  | % Recommended AB Tonsillitis       | 22.8%              | 33.5%  | 17.4%              | 20.8% | 10.7%              | 25.7% | 25.0%                                   | 28.9%  |
| SO6: Recommended AB Otitis Media | Sample Size of endpoint population | 137                | 145    | 92                 | 104   | 54                 | 96    | 774                                     | 711    |
|                                  | % Recommended AB Otitis Media      | 27.7%              | 37.9%  | 27.2%              | 41.3% | 33.3%              | 25.0% | 23.6%                                   | 29.3%  |

SO = Secondary Outcome; AB = antibiotics; URTI = upper respiratory tract infection

**Table S4: Comparison of intervention arms to standard care regarding secondary outcomes adjusted for additional covariates.**

| Secondary Outcome                                                |                                       | OR    | 95% CI of OR |       | p-Wert |
|------------------------------------------------------------------|---------------------------------------|-------|--------------|-------|--------|
|                                                                  |                                       |       | lower        | upper |        |
| acute bronchitis with a prescription for recommended antibiotics | Intervention arm I vs standard care   | 1.649 | 1.452        | 1.872 | <0.001 |
|                                                                  | Intervention arm II vs standard care  | 0.995 | 0.837        | 1.18  | 0.957  |
|                                                                  | Intervention arm III vs standard care | 1.391 | 1.196        | 1.615 | <0.001 |
|                                                                  | post vs pre                           | 1.443 | 1.312        | 1.587 | <0.001 |
|                                                                  | Age >65 vs 18-65                      | 0.996 | 0.992        | 0.999 | 0.017  |
|                                                                  | Female vs male                        | 0.933 | 0.848        | 1.027 | 0.159  |
|                                                                  | CCI 1,2 vs 0                          | 0.666 | 0.600        | 0.739 | <0.001 |
|                                                                  | CCI 3,4 vs 0                          | 0.641 | 0.525        | 0.778 | <0.001 |
|                                                                  | CCI ≥5 vs 0                           | 0.711 | 0.572        | 0.879 | 0.002  |
|                                                                  | Northern Europe vs GER                | 0.766 | 0.347        | 1.514 | 0.473  |
|                                                                  | Eastern Europe, Turkey, Arab. vs GER  | 1.246 | 1.082        | 1.432 | 0.002  |
|                                                                  | Southern Europe vs GER                | 1.148 | 0.76         | 1.694 | 0.497  |
|                                                                  | Other nationality vs GER              | 1.146 | 0.861        | 1.508 | 0.341  |
|                                                                  | urban vs rural                        | 1.257 | 1.126        | 1.403 | <0.001 |
| sinusitis with a prescription for recommended antibiotics        | Intervention arm I vs standard care   | 1.335 | 1.055        | 1.685 | 0.016  |
|                                                                  | Intervention arm II vs standard care  | 1.37  | 1.011        | 1.848 | 0.04   |
|                                                                  | Intervention arm III vs standard care | 2.218 | 1.704        | 2.878 | <0.001 |
|                                                                  | post vs pre                           | 1.248 | 1.046        | 1.49  | 0.014  |
|                                                                  | Age >65 vs 18-65                      | 0.87  | 0.648        | 1.158 | 0.347  |
|                                                                  | Female vs male                        | 0.904 | 0.753        | 1.087 | 0.28   |
|                                                                  | CCI 1,2 vs 0                          | 0.97  | 0.789        | 1.189 | 0.771  |
|                                                                  | CCI 3,4 vs 0                          | 1.065 | 0.71         | 1.569 | 0.754  |
|                                                                  | CCI ≥5 vs 0                           | 0.843 | 0.516        | 1.343 | 0.484  |
|                                                                  | Northern Europe vs GER                | 1.123 | 0.351        | 3.098 | 0.831  |
|                                                                  | Eastern Europe, Turkey, Arab. vs GER  | 0.768 | 0.57         | 1.022 | 0.076  |
|                                                                  | Southern Europe vs GER                | 2.263 | 1.248        | 4.007 | 0.006  |
|                                                                  | Other nationality vs GER              | 0.631 | 0.286        | 1.247 | 0.216  |
|                                                                  | urban vs rural                        | 1.508 | 1.224        | 1.855 | <0.001 |
| tonsillitis with a prescription for recommended antibiotics      | Intervention arm I vs standard care   | 1.154 | 0.948        | 1.401 | 0.152  |
|                                                                  | Intervention arm II vs standard care  | 0.683 | 0.536        | 0.863 | 0.002  |
|                                                                  | Intervention arm III vs standard care | 0.682 | 0.501        | 0.914 | 0.012  |
|                                                                  | post vs pre                           | 1.335 | 1.166        | 1.529 | <0.001 |
|                                                                  | Age <18 vs 18-65                      | 1.15  | 0.976        | 1.351 | 0.093  |
|                                                                  | Age >65 vs 18-65                      | 0.756 | 0.487        | 1.138 | 0.194  |
|                                                                  | Female vs male                        | 1.017 | 0.886        | 1.168 | 0.807  |
|                                                                  | CCI 1,2 vs 0                          | 0.735 | 0.606        | 0.887 | 0.001  |
|                                                                  | CCI 3,4 vs 0                          | 0.518 | 0.284        | 0.883 | 0.022  |
|                                                                  | CCI ≥5 vs 0                           | 0.48  | 0.236        | 0.893 | 0.029  |
|                                                                  | Northern Europe vs GER                | 1.258 | 0.563        | 2.627 | 0.555  |
|                                                                  | Eastern Europe, Turkey, Arab. vs GER  | 0.985 | 0.823        | 1.176 | 0.869  |

|                                                                        |                                       |       |       |        |        |
|------------------------------------------------------------------------|---------------------------------------|-------|-------|--------|--------|
|                                                                        | Other nationality vs GER              | 0.921 | 0.442 | 1.775  | 0.814  |
|                                                                        | Southern Europe vs GER                | 0.789 | 0.515 | 1.174  | 0.257  |
|                                                                        | urban vs rural                        | 0.982 | 0.843 | 1.144  | 0.814  |
| acute URTI with a pre-<br>scription for recom-<br>mended antibiotics   | Intervention arm I vs standard care   | 1.598 | 1.421 | 1.796  | <0.001 |
|                                                                        | Intervention arm II vs standard care  | 1.454 | 1.253 | 1.685  | <0.001 |
|                                                                        | Intervention arm III vs standard care | 1.552 | 1.349 | 1.782  | <0.001 |
|                                                                        | post vs pre                           | 1.357 | 1.245 | 1.479  | <0.001 |
|                                                                        | Age <18 vs 18-65                      | 1.661 | 1.438 | 1.913  | <0.001 |
|                                                                        | Age >65 vs 18-65                      | 0.808 | 0.698 | 0.934  | 0.004  |
|                                                                        | Female vs male                        | 0.927 | 0.849 | 1.012  | 0.089  |
|                                                                        | CCI 1,2 vs 0                          | 0.909 | 0.823 | 1.003  | 0.058  |
|                                                                        | CCI 3,4 vs 0                          | 0.848 | 0.689 | 1.037  | 0.114  |
|                                                                        | CCI ≥5 vs 0                           | 0.913 | 0.733 | 1.131  | 0.411  |
|                                                                        | Northern Europe vs GER                | 0.875 | 0.442 | 1.599  | 0.682  |
|                                                                        | Eastern Europe, Turkey, Arab. vs GER  | 0.954 | 0.837 | 1.086  | 0.481  |
|                                                                        | Southern Europe vs GER                | 1.12  | 0.777 | 1.582  | 0.53   |
|                                                                        | Other nationality vs GER              | 0.707 | 0.527 | 0.932  | 0.017  |
|                                                                        | urban vs rural                        | 1.536 | 1.392 | 1.696  | <0.001 |
| otitis media with a pre-<br>scription for recom-<br>mended antibiotics | Intervention arm I vs standard care   | 2.147 | 1.577 | 2.917  | <0.001 |
|                                                                        | Intervention arm II vs standard care  | 1.445 | 1.026 | 2.023  | 0.033  |
|                                                                        | Intervention arm III vs standard care | 1.733 | 1.149 | 2.581  | 0.008  |
|                                                                        | post vs pre                           | 1.376 | 1.132 | 1.675  | 0.001  |
|                                                                        | Age <18 vs 18-65                      | 1.855 | 1.479 | 2.328  | <0.001 |
|                                                                        | Age >65 vs 18-65                      | 1.011 | 0.662 | 1.522  | 0.958  |
|                                                                        | Female vs male                        | 1.099 | 0.9   | 1.343  | 0.356  |
|                                                                        | CCI 1,2 vs 0                          | 0.908 | 0.704 | 1.166  | 0.454  |
|                                                                        | CCI 3,4 vs 0                          | 0.812 | 0.462 | 1.383  | 0.455  |
|                                                                        | CCI ≥5 vs 0                           | 0.388 | 0.163 | 0.815  | 0.019  |
|                                                                        | Northern Europe vs GER                | 1.072 | 0.285 | 3.341  | 0.909  |
|                                                                        | Eastern Europe, Turkey, Arab. vs GER  | 1.144 | 0.866 | 1.504  | 0.338  |
|                                                                        | Southern Europe vs GER                | 1.545 | 0.57  | 3.844  | 0.364  |
|                                                                        | Other nationality vs GER              | 1.258 | 0.724 | 2.131  | 0.402  |
|                                                                        | urban vs rural                        | 1.762 | 1.413 | 2.203  | <0.001 |
| quinolone prescription                                                 | Intervention arm I vs standard care   | 0.921 | 0.821 | 1.031  | 0.156  |
|                                                                        | Intervention arm II vs standard care  | 0.713 | 0.597 | 0.848  | <0.001 |
|                                                                        | Intervention arm III vs standard care | 0.72  | 0.618 | 0.837  | <0.001 |
|                                                                        | post vs pre                           | 0.74  | 0.677 | 0.809  | <0.001 |
|                                                                        | Age <18 vs 18-65                      | 8.865 | 5.954 | 13.969 | <0.001 |

|                                      |        |       |        |        |
|--------------------------------------|--------|-------|--------|--------|
| Age >65 vs 18-65                     | 11.687 | 7.724 | 18.647 | <0.001 |
| Female vs male                       | 0.999  | 0.915 | 1.092  | 0.989  |
| CCI 1,2 vs 0                         | 1.588  | 1.441 | 1.751  | <0.001 |
| CCI 3,4 vs 0                         | 1.902  | 1.611 | 2.239  | <0.001 |
| CCI ≥5 vs 0                          | 2.029  | 1.698 | 2.416  | <0.001 |
| Northern Europe vs GER               | 0.778  | 0.365 | 1.452  | 0.47   |
| Eastern Europe, Turkey, Arab. vs GER | 0.902  | 0.78  | 1.038  | 0.155  |
| Southern Europe vs GER               | 0.849  | 0.543 | 1.266  | 0.448  |
| Other vs GER                         | 1.152  | 0.881 | 1.483  | 0.287  |
| urban vs rural                       | 0.742  | 0.671 | 0.821  | <0.001 |

## Supplementary File S3:

**Table S5: Diagnoses Primary Outcome.**

| Diagnoses                    | ICD-10 Code                                      |
|------------------------------|--------------------------------------------------|
| Upper Respiratory Infections | J00; J02.0; J02.8, J02.9; J04; J06; J10.1; J11.1 |
| Bronchitis                   | J20; J21.0; J21.1, J21.8; J21.9; J22; J40        |
| Tonsillitis                  | J03.9                                            |
| Sinusitis                    | J01                                              |
| Otitis Media                 | H65.0; H65.1; H65.9; H66.0; H66.4; H66.9         |

**Table S6: Disregarded Diagnoses \***

|               |                                                                                                                                                                                                                           |
|---------------|---------------------------------------------------------------------------------------------------------------------------------------------------------------------------------------------------------------------------|
| A00 bis A79.9 | infectious colon diseases;<br>Tuberculosis; specific bacterial zoonoses;<br>other bacterial diseases;<br>sexually transmitted diseases; other<br>spirochetes diseases; other chlamydia-induced<br>diseases; Rickettsioses |
| E84           | Cystic fibrosis                                                                                                                                                                                                           |
| J44.0, J44.1  | Other chronic obstructive lung diseases                                                                                                                                                                                   |

|       |                                     |
|-------|-------------------------------------|
| N10   | Acute tubulo-interstitial nephritis |
| N12   | Nephritis not acute or interstitial |
| N30   | Cystitis                            |
| N39.0 | Other urinary tract infections      |
| N41   | Inflammatory prostate diseases      |
| O     | Pregnancy, birth, puerperium        |

\* Cases with disregarded diagnoses in an observed quarter are not considered for analysis.

**Table S7: Currently recommended and alternative Antibiotics.**

|                              | Recommended Antibiotics           | Alternative Antibiotics                                                                                                                                                                                      |
|------------------------------|-----------------------------------|--------------------------------------------------------------------------------------------------------------------------------------------------------------------------------------------------------------|
| Upper Respiratory Infections | J01CA04 (Amoxicillin)             | -                                                                                                                                                                                                            |
| Bronchitis                   | J01CA04 (Amoxicillin)             | J01AA02 (Doxycyclin); J01CE02 (Phenoxymethylpenicillin); J01FA (Macrolides)                                                                                                                                  |
| Tonsillitis                  | J01CE02 (Phenoxymethylpenicillin) | J01DB (Cephalosporins); J01FA01 (Erythromycin)                                                                                                                                                               |
| Sinusitis                    | J01CA04 (Amoxicillin)             | J01DC (Cephalosporins 2 <sup>nd</sup> Gen); J01AA02 (Doxycyclin); J01EE01 (Sulfamethoxazol and Trimethoprim); J01CR02 (Amoxicillin and beta-lactamase-inhibitors); J01CR22 (Amoxicillin and Clavulanic acid) |
| Otitis Media                 | J01CA04 (Amoxicillin)             | J01DC (Cephalosporins 2 <sup>nd</sup> Gen); J01FA01 (Erythromycin); J01CR02 (Amoxicillin and beta-lactamase-inhibitors); J01CR22 (Amoxicillin and Clavulanic acid)                                           |
